# Supplementary material
Source: ML conference proceedings conference paper supplement (https://openreview.net/forum?id=kAU6Cdq1gV)
Supplement: supplementary_material [file attachment]

---

# Discovering General Reinforcement Learning Algorithms with Adversarial Environment Design — Supplementary Materials

---

## 1 Hyperparameters

### 1.1 GROOVE

Hyperparameters shared between GROOVE and LPG were tuned using LPG on Grid-World, then transferred to GROOVE without further tuning. The additional GROOVE hyperparameters (regarding the level buffer) were then tuned separately on Grid-World.

Table 1: GROOVE/LPG hyperparameters

| Hyperparameter                                              | Value  |
|-------------------------------------------------------------|--------|
| Optimizer                                                   | Adam   |
| Learning rate                                               | 0.0001 |
| Discount factor                                             | 0.99   |
| Policy entropy coefficient ( $\beta_0$ )                    | 0.05   |
| Bootstrap entropy coefficient ( $\beta_1$ )                 | 0.001  |
| L2 regularization coefficient for $\hat{\pi}$ ( $\beta_2$ ) | 0.005  |
| L2 regularization coefficient for $\hat{y}$ ( $\beta_3$ )   | 0.001  |
| Level buffer size                                           | 4000   |
| Replay probability                                          | 0.5    |
| Number of interactions per agent update                     | 20     |
| Number of agent updates per optimizer update                | 5      |
| Number of parallel lifetimes                                | 512    |
| Number of parallel environments per lifetime                | 64     |
| Algorithmic regret baseline algorithm                       | A2C    |

### 1.2 Agents

Agent hyperparameters were based on tuned A2C agents, before being fine-tuned with LPG. Since we meta-train on a continuous distribution of Grid-World environments, we do not use the agent hyperparameter bandit proposed by Oh et al. [2020] for meta-training.

Table 2: Agent hyperparameters—architecture descriptions  $D(N)$  and  $C(N)$  respectively refer to dense and convolutional layers of size  $N$ ; ReLU activations are used throughout.

| Hyperparameter                          | Environment |             |                          |
|-----------------------------------------|-------------|-------------|--------------------------|
|                                         | Grid-World  | Min-Atar    | Atari                    |
| Architecture                            | Tabular     | D(64)-D(64) | C(32)-C(64)-C(64)-D(512) |
| Optimizer                               | SGD         | Adam        | Adam                     |
| Learning rate                           | 40          | 0.0005      | 0.0005                   |
| Bootstrap KL coefficient ( $\alpha_y$ ) | 0.5         | 0.5         | 0.5                      |
| Train steps                             | 2500        | 100,000     | 100,000                  |
| Agent seeds per LPG seed                | 64          | 16          | 1                        |

## 10 2 Handcrafted Environments

11 For our handcrafted environment set, we use the set of five tabular Grid-World configurations from  
12 Oh et al. [2020]. Grid-World objects are defined by  $[r, \epsilon_{\text{term}}, \epsilon_{\text{respawn}}]$ , where  $r$  represents the reward  
13 when collected,  $\epsilon_{\text{term}}$  is the episode-termination probability and  $\epsilon_{\text{respawn}}$  is the probability of the object  
14 respawning each step after collection.

### 15 2.1 Dense

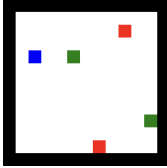

| Property               | Value                                                 |
|------------------------|-------------------------------------------------------|
| Size                   | $11 \times 11$                                        |
| Objects                | $2 \times [1, 0, 0.05], [-1, 0.5, 0.1], [-1, 0, 0.5]$ |
| Maximum episode length | 500                                                   |

### 16 2.2 Sparse

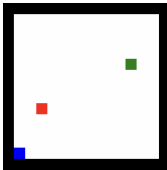

| Property               | Value                   |
|------------------------|-------------------------|
| Size                   | $13 \times 13$          |
| Objects                | $[1, 1, 0], [-1, 1, 0]$ |
| Maximum episode length | 50                      |

### 17 2.3 Long Horizon

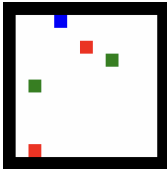

| Property               | Value                                          |
|------------------------|------------------------------------------------|
| Size                   | $11 \times 11$                                 |
| Objects                | $2 \times [1, 0, 0.01], 2 \times [-1, 0.5, 1]$ |
| Maximum episode length | 1000                                           |

### 18 2.4 Longer Horizon

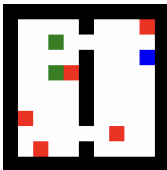

| Property               | Value                                            |
|------------------------|--------------------------------------------------|
| Size                   | $9 \times 9$                                     |
| Objects                | $2 \times [1, 0.1, 0.01], 5 \times [-1, 0.8, 1]$ |
| Maximum episode length | 2000                                             |

19 Note: size is increased from  $7 \times 9$  for consistency with our generalized Grid-World distribution.

### 20 2.5 Long Dense

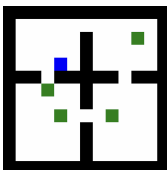

| Property               | Value                    |
|------------------------|--------------------------|
| Size                   | $11 \times 11$           |
| Objects                | $4 \times [1, 0, 0.005]$ |
| Maximum episode length | 2000                     |

21 **3 Atari Training Curves**

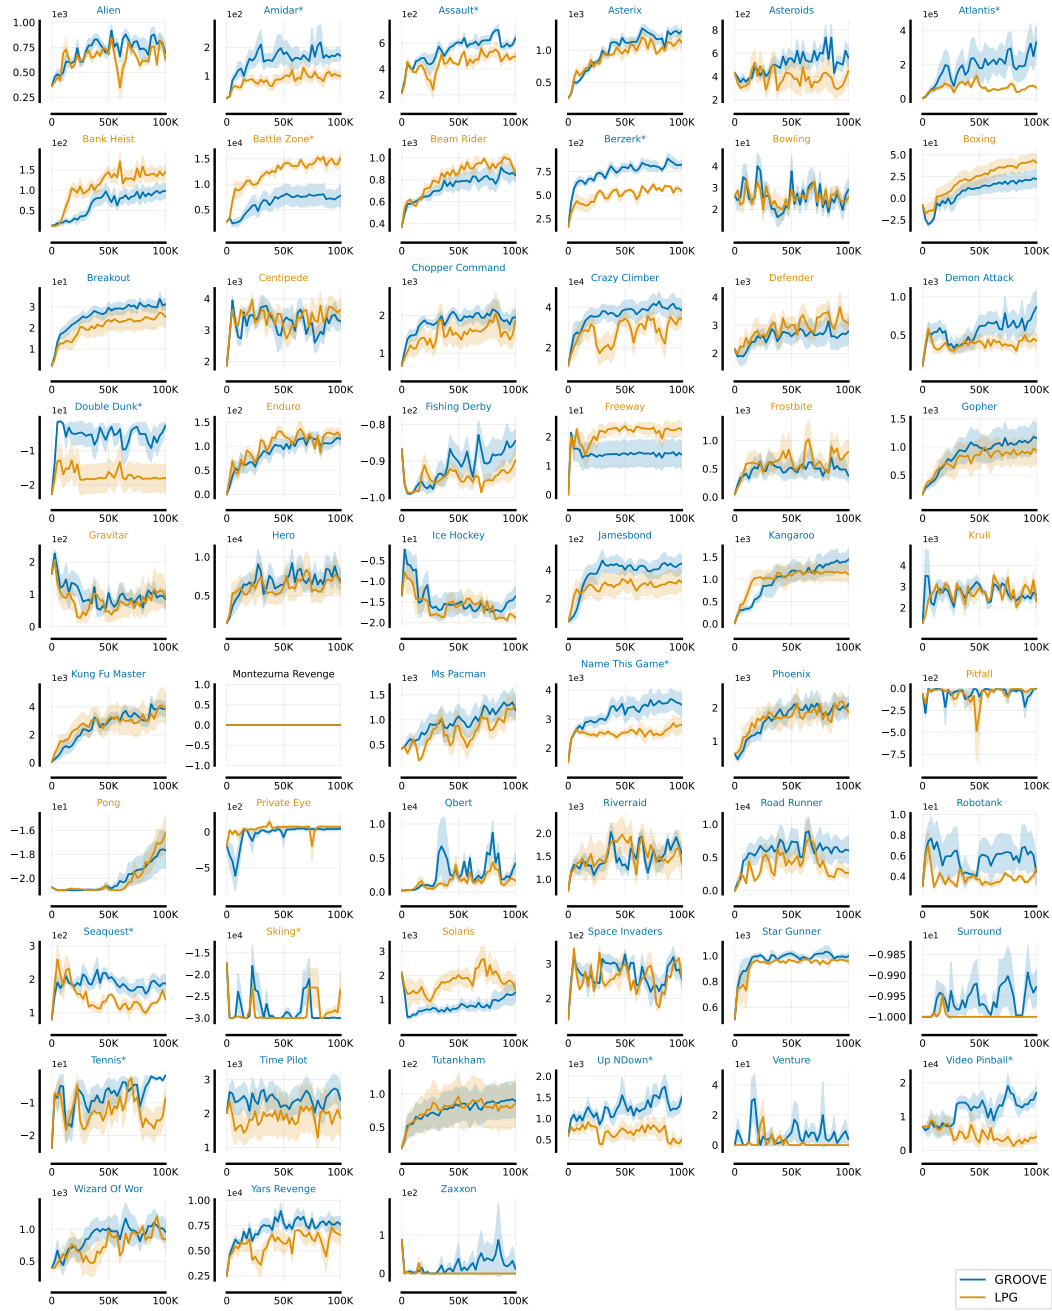

Figure 7: Atari training curves—environment names are highlighted according to highest evaluation return, asterisks (\*) denote significant differences in evaluation return (5 seeds,  $p < 0.05$ ).

22 **4 Min-Atar Per-Task Performance**

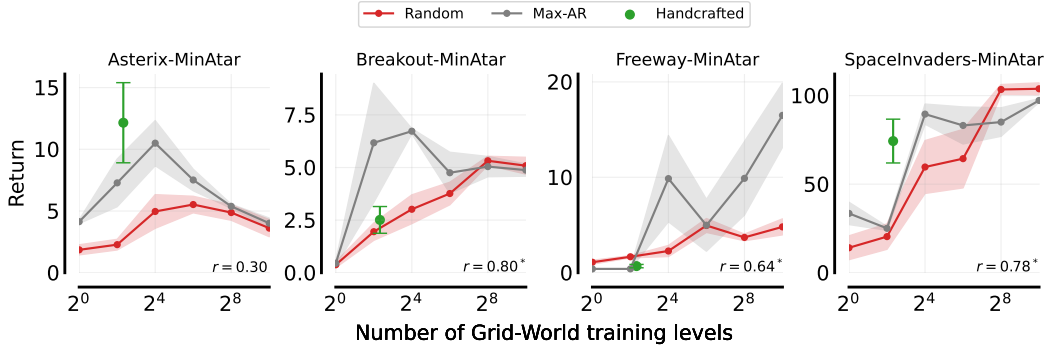

Figure 8: Generalization performance on Min-Atar, after meta-training LPG on variable-sized sets of Grid-World levels (5 seeds)—levels are selected through uniform-random sampling of all levels (“Random”), from the highest-regret levels of a previous LPG instance (“Max-AR”), or from a set of five handcrafted levels (“Handcrafted”). Pearson correlation coefficient is given for Random levels; significant positive correlations are marked with an asterisk (\*).

23 As expected, we observe increased noise when breaking down performance by individual Min-Atar  
 24 tasks, however, the results from the majority of tasks support our earlier conclusions. Firstly, we  
 25 observe a significant positive correlation between the number of random training levels and return on  
 26 three of the four Min-Atar tasks, again demonstrating the impact of task diversity on generalization.  
 27 When controlling for the number of levels, we observe improved performance after training on  
 28 handcrafted, rather than random, levels on three of the four Min-Atar tasks. Furthermore, on Asterix,  
 29 training on handcrafted levels results in higher performance than the largest set of  $2^{10} = 1024$  random  
 30 levels, supporting our conclusion about level informativeness.

31 After training on high-AR levels, we observe an improvement against random levels on at least three  
 32 of the four Min-Atar tasks for all sizes of training environment set up to  $2^6 = 64$  levels. Beyond this,  
 33 random and high-AR levels outperform each other on an equal number of tasks, however the dilution  
 34 in mean AR for larger training sets makes this convergence unsurprising. Furthermore, high-AR  
 35 levels are competitive with handcrafted levels at the same training set size and quickly outperform  
 36 the fixed handcrafted set as more high-AR levels are added, demonstrating the effectiveness of AR at  
 37 identifying informative curricula.
